# Supplementary material
Source: PubMed Central journal article supplement (PMC7104364)
Supplement: EMS83507-supplement-SF1.pdf [file EMS83507-supplement-SF1.pdf]

## Supplementary Figure 1

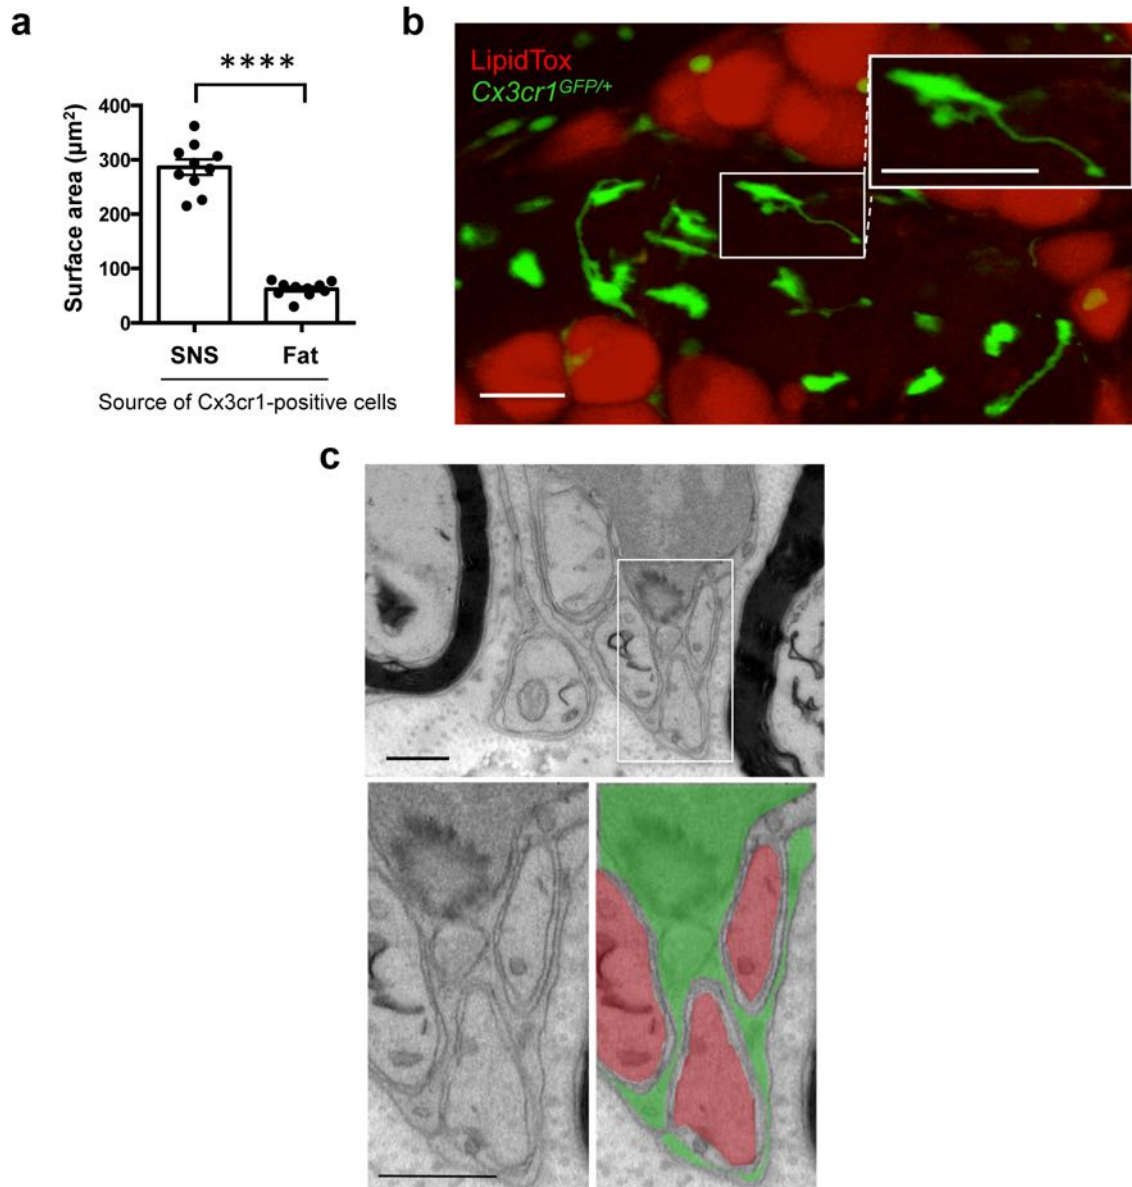

**Supplementary Figure 1. Sympathetic neuron-associated Cx3cr1<sup>GFP/+</sup> cells differ in morphology from Cx3cr1<sup>GFP/+</sup> cells in the parenchyma of adipose tissue and wrap around non-myelinated neurons in adipose tissue.**

(a) Surface area of Cx3cr1<sup>GFP/+</sup> cells associated with the nerve fibers (SNS) and fat was quantified from 3 independent experiments. 3-4 measurements were taken per one multi-photon image.  $n = 10$  per group, \*\*\*\* $P < 0.0001$ . (b) Intra-vital multi-photon visualization of a neuro-adipose connection in the inguinal fat pad of a live Cx3cr1<sup>GFP/+</sup> mouse; LipidTOX (red) labels adipocytes. Images are representative of 3 similar experiments. Boxed region represents higher magnification of the same micrograph. Scale bars, 50 μm. (c) Upper panel: electron microscopy image of a sympathetic fiber dissected from subcutaneous adipose tissue with lower panels being higher magnification of the same micrograph. Lower right panel: electron micrograph with false color-coding highlighting cells wrapping around the neurons (green) and sympathetic neurons (red). Scale bars, 500 nm. Data in panel a were analyzed by two-tailed Student's *t*-test.
