# Supplementary material
Source: PubMed Central journal article supplement (PMC7104364)
Supplement: EMS83507-supplement-SF2.pdf [file EMS83507-supplement-SF2.pdf]

## Supplementary Figure 2

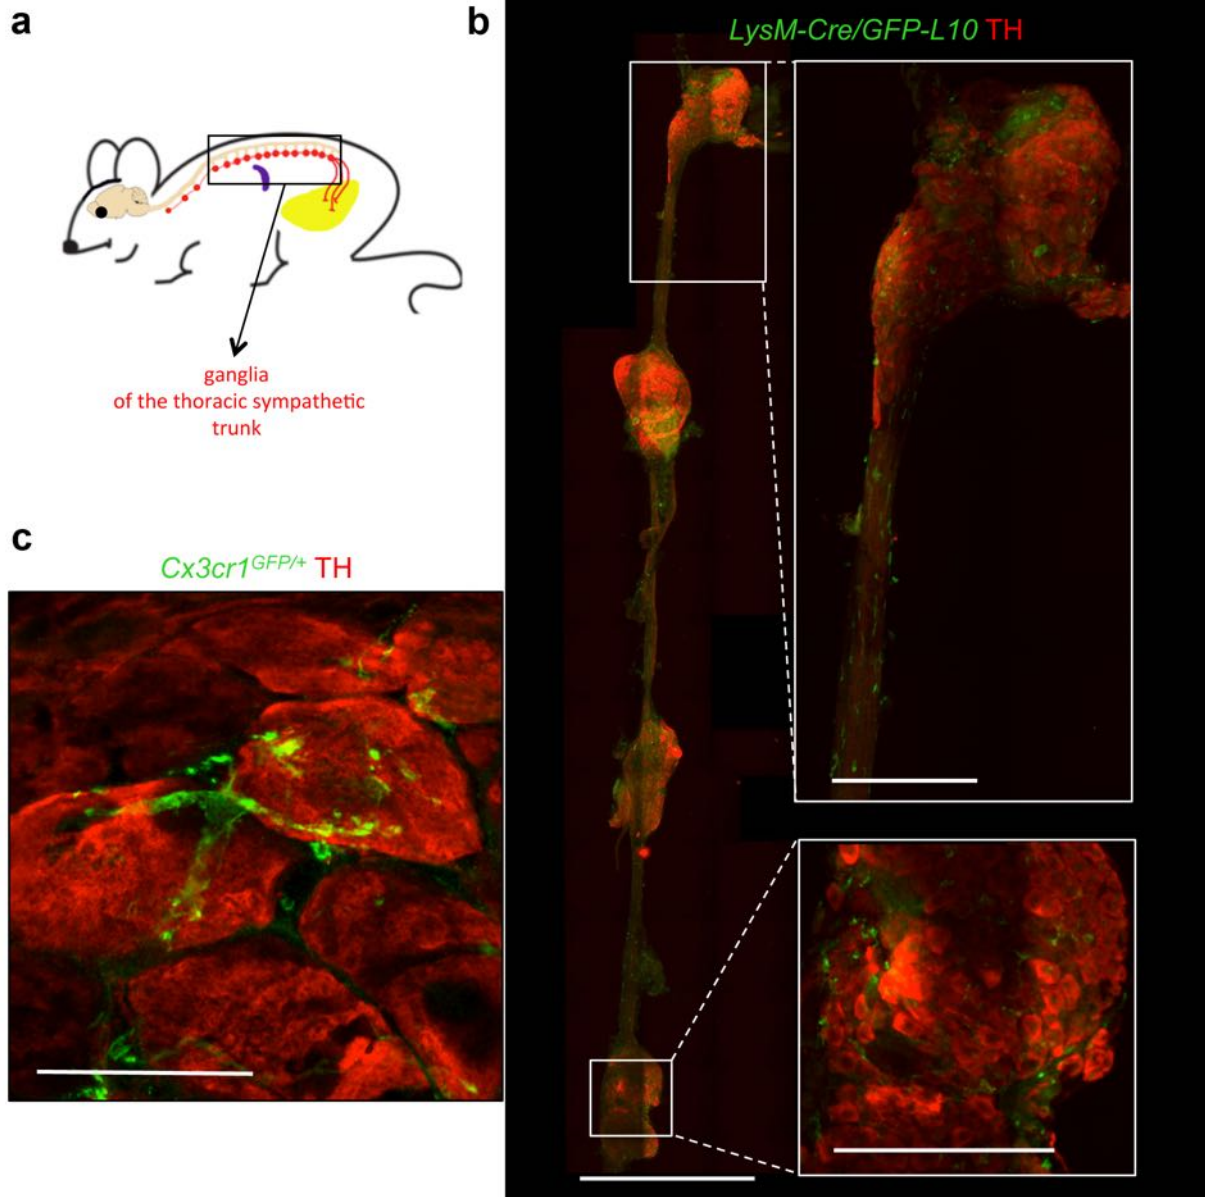

**Supplementary Figure 2. Sympathetic neuron-associated  $Cx3cr1^{GFP/+}$  cells are present in different compartments of the SNS.**

(a) Schematic representation of the sympathetic thoracic chain ganglia. (b) Confocal images from sympathetic thoracic chain isolated from *LysM-Cre/GFP-L10* mice and stained using anti-TH (red) and anti-GFP (green) antibodies. Images are representative of 3 similar experiments. Scale bar, 0.5 mm. Boxed regions represent higher magnification of the same micrograph - scale bars, 125  $\mu\text{m}$ . (c) Confocal images from sympathetic chain isolated from *Cx3cr1<sup>GFP/+</sup>* mice and stained using anti-TH (red) and anti-GFP (green) antibodies. Images are representative of 3 similar experiments. Scale bar, 25  $\mu\text{m}$ .
