# Supplementary material
Source: PubMed Central journal article supplement (PMC7104364)
Supplement: EMS83507-supplement-SF4.pdf [file EMS83507-supplement-SF4.pdf]

## Supplementary Figure 4

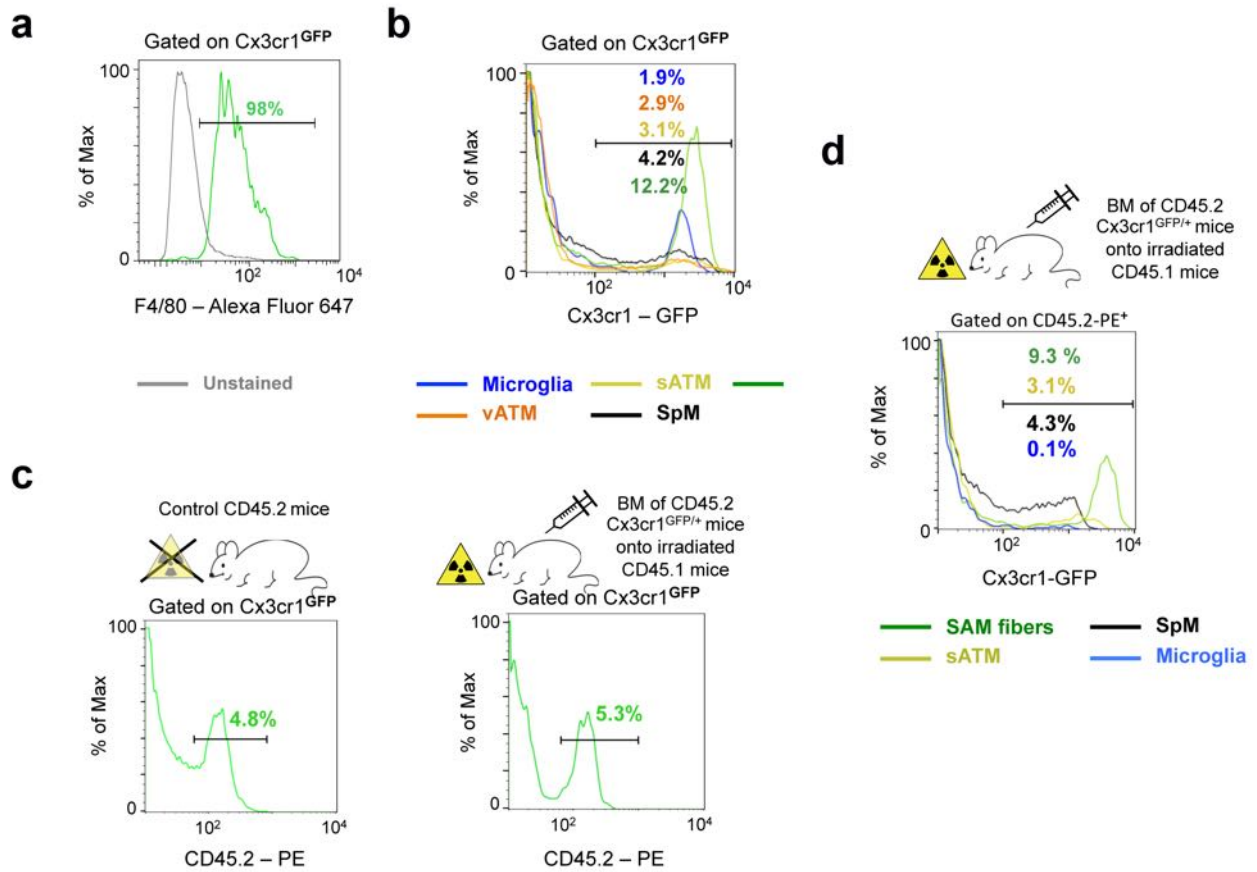

### Supplementary Figure 4. Sympathetic neuron-associated $Cx3cr1^{GFP/+}$ cells are macrophages and repopulate after bone marrow irradiation.

(a) Representative flow cytometry histogram for F4/80–Alexa Fluor 647 expression by  $Cx3cr1$ -positive cells in the nerve fibers in subcutaneous fat from  $Cx3cr1^{GFP/+}$  mice. Cells were gated on  $Cx3cr1$ -GFP-positive population. Histograms are representative of 5 independent experiments. (b) Percentages of  $Cx3cr1$ -GFP-positive cells in the following tissues: spleen (SpM; black), visceral adipose tissue (vATM; orange), subcutaneous adipose tissue (sATM; yellow), sympathetic nerve fibers (SAM fibers; green) and brain (Microglia; blue). Cells were gated on CD45.2-PE-positive population. Histograms are representative of 5 independent experiments. (c-d) Bone marrow chimeras of  $Cx3cr1^{GFP/+}$  donors onto irradiated  $B6-CD45.1$  host mice. (c) Percentages of CD45.2-PE-positive cells in sympathetic nerve fibers are shown in non-irradiated control  $B6-CD45.2$  (left panel) and irradiated  $B6-CD45.1$  chimeric mice that were reconstituted with bone marrow from  $B6-CD45.2$  mice (right panel). Histograms are representative of 3 experiments. (d) Percentages of  $Cx3cr1$ -GFP-positive cells in sympathetic nerve fibers (green), adipose tissue (yellow), spleen (black) and brain (blue) in irradiated  $B6-CD45.1$  mice that were reconstituted with bone marrow from  $Cx3cr1^{GFP/+}$  mice. Cells were gated on CD45.2-PE-positive population. Histograms are representative of 3 experiments.
