# Supplementary material
Source: PubMed Central journal article supplement (PMC7104364)
Supplement: EMS83507-supplement-SF10.pdf [file EMS83507-supplement-SF10.pdf]

## Supplementary Figure 10

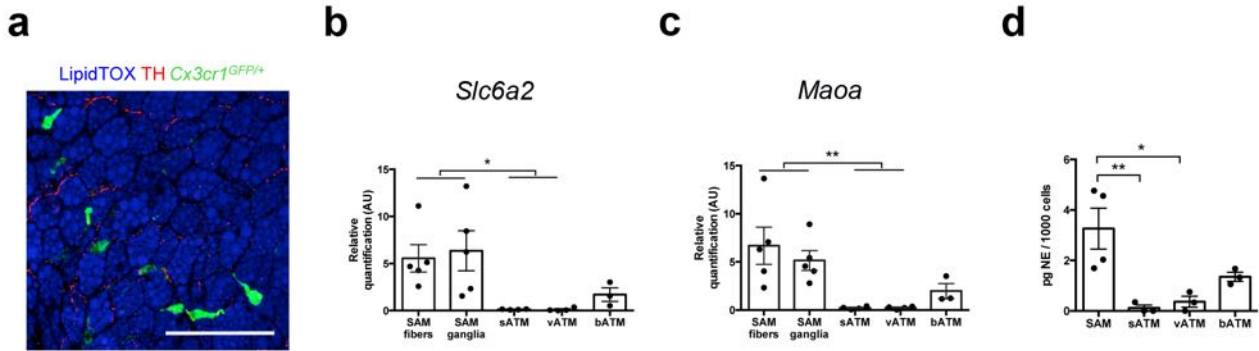

### Supplementary Figure 10. Macrophages in brown adipose tissue have intermediate phenotype between ATMs and SAMs.

**(a)** Confocal image of BAT isolated from *Cx3cr1*<sup>GFP/+</sup> mice and stained using lipid stain LipidTOX (blue), anti-TH (red) and anti-GFP (green) antibodies. Micrograph is representative of 2 experiments. Scale bar, 100  $\mu$ m. **(b)** Expression of mRNA for *Slc6a2* determined by qRT-PCR relative to *Gapdh* expression. Each data point represents tissues pooled from 10 mice.  $n = 5$  experiments for SAM fibers and SAM ganglia,  $n = 4$  experiments for vATM, sATM,  $n = 3$  experiments for bATM,  $*P < 0.05$ . **(c)** Expression of mRNA for *Maoa* determined by qRT-PCR relative to *Gapdh* expression. Each data point represents tissues pooled from 10 mice.  $n = 5$  experiments for SAM fibers and SAM ganglia,  $n = 4$  experiments for vATM, sATM and  $n = 3$  experiments for bATM,  $**P < 0.01$ . **(d)** NE content in sorted CD45.2-PE, F4/80-Alexa Fluor 647 – double positive cells measured by NE ELISA. Number of cells used in NE assays were as follows:  $858 \pm 258$  for SAMs ( $n = 4$  experiments), 1000 cells for sATM and vATM ( $n = 3$  experiments),  $1494 \pm 172$  for bATM ( $n = 3$  experiments).  $*P < 0.05$ ,  $**P < 0.01$ . Data in panels **b,c,d** were analyzed by one-way ANOVA followed by Tukey's multiple comparison test and are shown as average  $\pm$  SEM. Data for SAM, sATM and vATM in panels **b, c**, and **d** are also shown in **Figure 2 g, h**, and **i**.
