# Supplementary material
Source: PubMed Central journal article supplement (PMC7104364)
Supplement: EMS83507-supplement-SF11.pdf [file EMS83507-supplement-SF11.pdf]

## Supplementary Figure 11

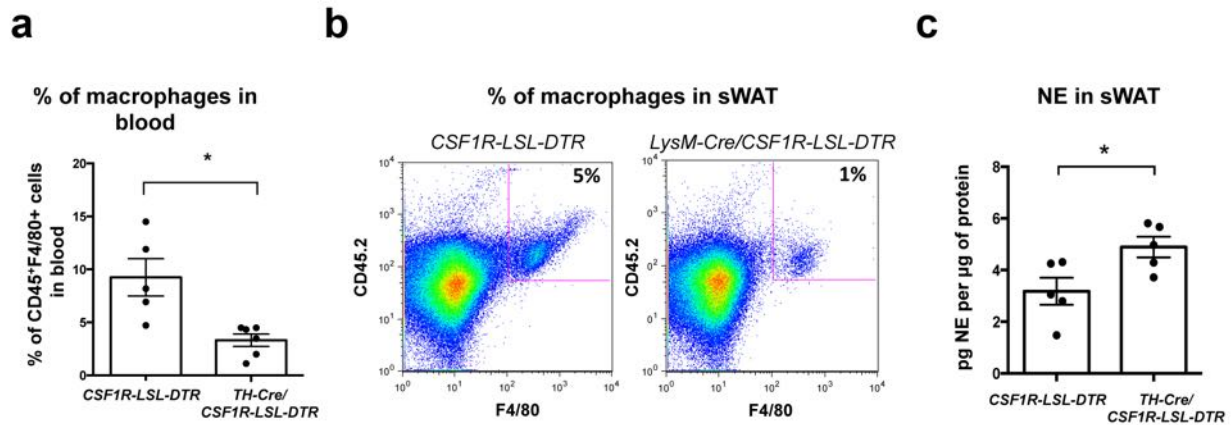

### Supplementary Figure 11. Depletion of macrophages upregulates NE content in adipose tissue.

**(a)** Percentages of CD45.2, F4/80-double positive cells in blood of control *CSF1R-LSL-DTR* and *LysM-Cre/CSF1R-LSL-DTR* mice after 4 doses of DT. Each data point represents one mouse.  $n = 5$  mice for *CSF1R-LSL-DTR*, and  $n = 6$  mice for *LysM-Cre/CSF1R-LSL-DTR*,  $*P = 0.025$ . Data are representative of 2 experiments. **(b)** Representative flow cytometry plots showing percentages of CD45.2, F4/80-double positive cells in sWAT of control *CSF1R-LSL-DTR* and *LysM-Cre/CSF1R-LSL-DTR* mice after 4 doses of DT. Data are representative of 2 experiments. **(c)** NE content in sWAT fat pads isolated from control *CSF1R-LSL-DTR* and *LysM-Cre/CSF1R-LSL-DTR* mice after 4 doses of DT. Each data point represents one mouse,  $n = 5$  mice per group,  $*P = 0.034$ . Data are representative of 2 experiments. Data from panels **a,c** were analyzed by two-tailed Student's *t*-test and are shown as average  $\pm$  SEM.
